# Supplementary material
Source: PubMed Central journal article supplement (PMC3816804)
Supplement: ijcep0006-2357-f6.pdf [file ijcep0006-2357-f6.pdf]

## SIRT1 positively regulates migration of NSCLC cells

**Table S1A.** 153 epigenetic genes

| Gene      | Gene     | Gene   | Gene   | Gene    | Gene     |
|-----------|----------|--------|--------|---------|----------|
| ACTL6A    | C17ORF49 | JMJD1C | MECOM  | PRMT6   | SUV39H1  |
| ALKBH4    | CARM1    | JMJD4  | MEN1   | PRMT7   | SUV39H2  |
| ALKBH5    | CBX2     | JMJD5  | MLL    | PRMT8   | SUV420H1 |
| ALKBH6    | CBX7     | JMJD6  | MLL2   | RAD54L  | SUV420H2 |
| ALKBH7    | CHD4     | JMJD7  | MLL3   | RAD54L2 | UTY      |
| ALKBH8    | CIITA    | JMJD8  | MLL5   | REST    | WHSC1    |
| ARID1A    | CREBBP   | KAT2A  | MPG    | RNF2    | WHSC1L1  |
| ARID2     | CSRP2BP  | KAT2B  | MTA3   | RNF20   | ZMYND8   |
| ASF1A     | DOT1L    | KAT5   | NSD1   | RPS6KA3 |          |
| ASF1B     | DZIP3    | KAT6A  | PHF6   | RPS6KA5 |          |
| ASH1L     | EGLN2    | KAT6B  | PRDM1  | SETD1A  |          |
| ASH2L     | EHMT1    | KAT7   | PRDM10 | SETD1B  |          |
| ASXL1     | EHMT2    | KAT8   | PRDM11 | SETD2   |          |
| ATAD2     | EPC1     | KDM1A  | PRDM12 | SETD3   |          |
| ATF2      | ESCO1    | KDM1B  | PRDM13 | SETD4   |          |
| ATF7IP    | ESCO2    | KDM2A  | PRDM14 | SETD5   |          |
| ATRX      | EZH1     | KDM2B  | PRDM15 | SETD6   |          |
| BAZ1A     | EZH2     | KDM3A  | PRDM16 | SETD7   |          |
| BAZ1B     | FBXO11   | KDM3B  | PRDM2  | SETD8   |          |
| BAZ2A     | HAT1     | KDM4A  | PRDM4  | SETDB1  |          |
| BAZ2B     | HDAC1    | KDM4B  | PRDM5  | SETDB2  |          |
| BMI1      | HDAC2    | KDM4C  | PRDM6  | SETMAR  |          |
| BRCA2     | HDAC3    | KDM4D  | PRDM7  | SIRT1   |          |
| BRD1      | HDAC5    | KDM5A  | PRDM8  | SIRT2   |          |
| BRD2      | HDAC6    | KDM5B  | PRDM9  | SMYD1   |          |
| BRD8      | HDAC7    | KDM5C  | PRMT1  | SMYD2   |          |
| BRDT      | HDAC8    | KDM5D  | PRMT2  | SMYD3   |          |
| BRWD3     | JARID2   | KDM6A  | PRMT3  | SMYD4   |          |
| C14ORF169 | JHDM1D   | KDM6B  | PRMT5  | SMYD5   |          |

## SIRT1 positively regulates migration of NSCLC cells

**Table S1B.** 25 genes in positive regulation and 26 genes in negative regulation of A540 cell migration

| Gene    | relative migration | <i>P</i> value | Gene     | relative migration | <i>P</i> value |
|---------|--------------------|----------------|----------|--------------------|----------------|
| ESCO2   | 0.010              | 0.00002        | KDM4B    | 1.278              | 0.039          |
| ASF1B   | 0.264              | 0.002          | SETD1B   | 1.278              | 0.034          |
| SIRT2   | 0.323              | 0.001          | KDM4A    | 1.278              | 0.034          |
| KAT2A   | 0.324              | 0.005          | PRMT5    | 1.279              | 0.016          |
| CBX2    | 0.336              | 0.001          | WHSC1L1  | 1.290              | 0.047          |
| ATRX    | 0.338              | 0.006          | MEN1     | 1.298              | 0.038          |
| HDAC7   | 0.340              | 0.006          | PRDM4    | 1.298              | 0.029          |
| ATAD2   | 0.364              | 0.009          | BRDT     | 1.311              | 0.022          |
| BRDT    | 0.398              | 0.004          | SUV420H1 | 1.317              | 0.046          |
| BRWD3   | 0.398              | 0.004          | ALKBH7   | 1.320              | 0.020          |
| ALKBH4  | 0.408              | 0.007          | ALKBH6   | 1.320              | 0.032          |
| ALKBH5  | 0.443              | 0.010          | REST     | 1.329              | 0.015          |
| HDAC5   | 0.453              | 0.033          | KDM2B    | 1.335              | 0.010          |
| BRD2    | 0.467              | 0.033          | BMI1     | 1.346              | 0.008          |
| ASH1L   | 0.483              | 0.049          | MPG      | 1.346              | 0.013          |
| ZMYND8  | 0.508              | 0.018          | MECOM    | 1.354              | 0.012          |
| PRDM6   | 0.510              | 0.007          | KDM5D    | 1.354              | 0.038          |
| BRCA2   | 0.634              | 0.036          | SETD3    | 1.372              | 0.021          |
| ARID1A  | 0.642              | 0.041          | C17ORF49 | 1.372              | 0.015          |
| KDM5B   | 0.674              | 0.014          | HDAC6    | 1.394              | 0.004          |
| PRMT1   | 0.684              | 0.008          | EHMT1    | 1.407              | 0.004          |
| PRDM14  | 0.694              | 0.016          | SETD6    | 1.451              | 0.001          |
| SIRT1   | 0.721              | 0.032          | UTY      | 1.460              | 0.002          |
| SUV39H2 | 0.737              | 0.035          | KDM6A    | 1.513              | 0.0004         |
| PRDM1   | 0.765              | 0.037          | ATRX     | 1.534              | 0.019          |
|         |                    |                | SETD2    | 1.548              | 0.001          |

**Table S2.** Primers for qPCR

| gene  | forward                  | reverse               |
|-------|--------------------------|-----------------------|
| Actb  | caccatgtaccctggcatt      | gtacttgcgctcaggaggag  |
| KDM5B | atcgagtgggctcaggact      | tgccaggaggttgagataacc |
| SIRT1 | agagtggcaaaggagcagattagt | cctcagcgccatggaaaat   |
